# Supplementary material for: Tandem gene duplications drive divergent evolution of caffeine and crocin biosynthetic pathways in plants
Source: PubMed Central journal article supplement (PMC7302004; doi:10.1186/s12915-020-00795-3), 2020-06-18

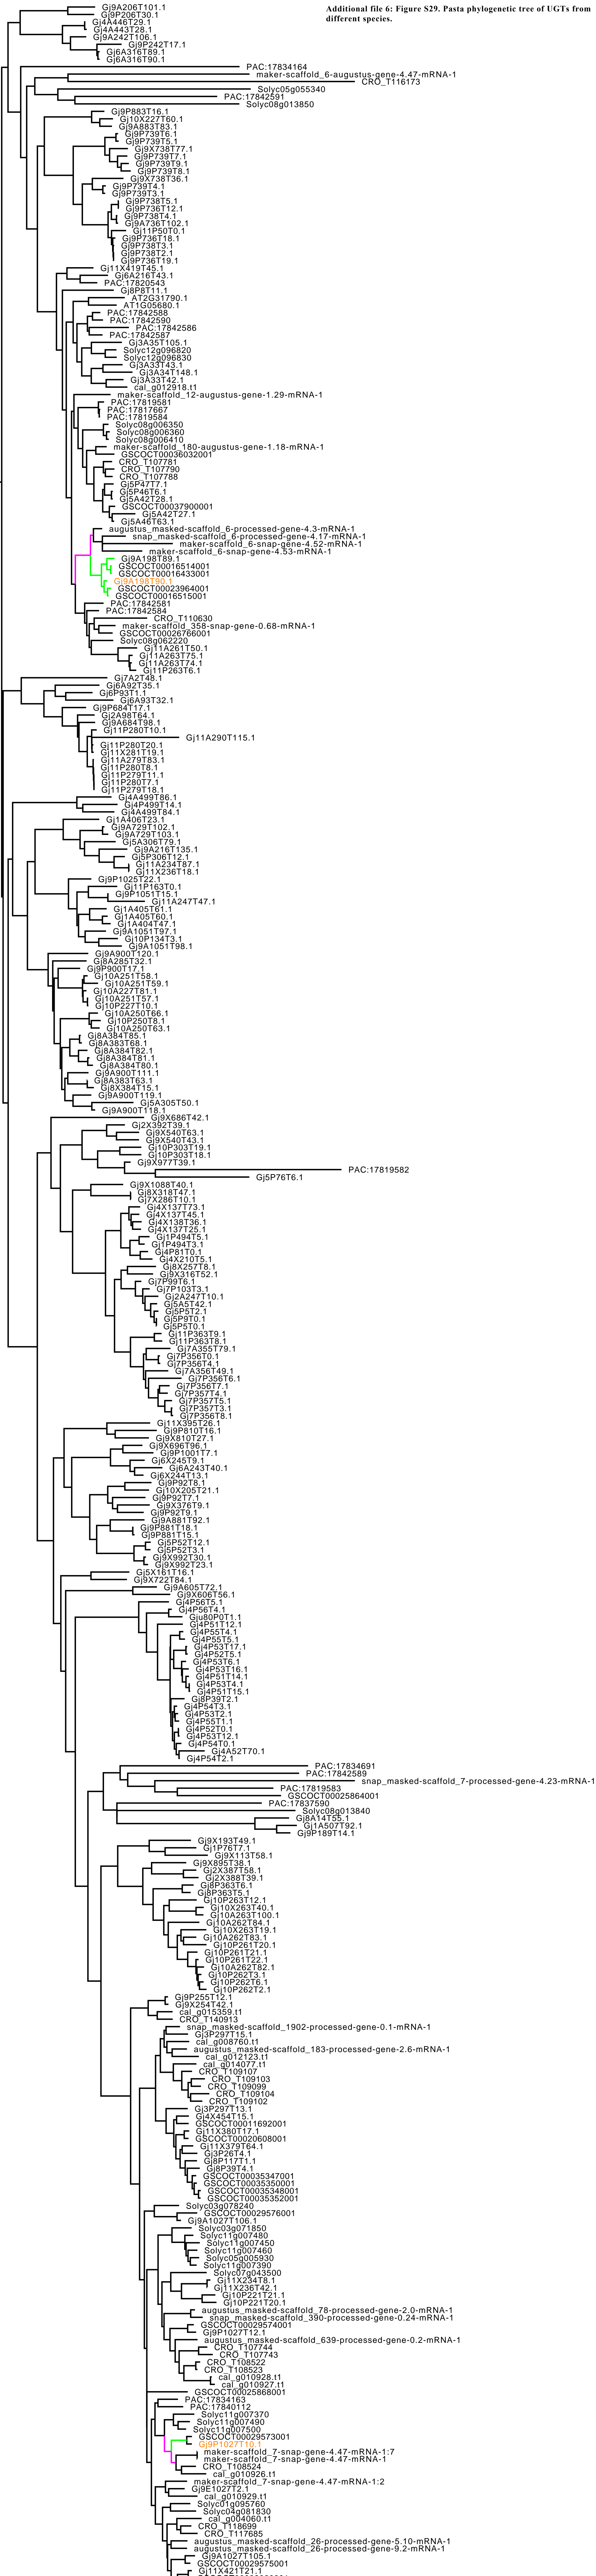

Supplement: 12915_2020_795_MOESM6_ESM.pdf [file 12915_2020_795_MOESM6_ESM.pdf]
